# Supplementary material
Source: PubMed Central journal article supplement (PMC1891208)
Supplement: pnas_0703522104_3.pdf [file pnas_0703522104_3.pdf]

| <i>Parameter</i>     | <i>Units</i>                                   | <i>Values</i> | <i>Description</i>                                       |
|----------------------|------------------------------------------------|---------------|----------------------------------------------------------|
| $N_A$                | molecules                                      | 10            | Number of each agent type                                |
| $E_N$                | molecules                                      | $10^4$        | Environment resources available in bulk                  |
| $k_{\text{on}}$      | $\text{time}^{-1}$                             | 0.005         | Basic rate of association with the lattice               |
| $k_{\text{off}}$     | $\text{time}^{-1}$                             | 0.001         | Dissociation from the lattice                            |
| $k_{\text{coop}}$    | $\text{time}^{-1} \cdot \text{molecules}^{-1}$ | 1             | Resource-mediated association with lattice               |
| $D_{\text{lattice}}$ | $\text{length} \cdot \text{time}^{-1}$         | 0.001         | Spatial diffusion on the lattice                         |
| $k_{x-y}$            | $\text{time}^{-1} \cdot \text{molecules}^{-1}$ | 0.1           | Agent catalysis of resource conversion                   |
| $k_{\text{form}}$    | $\text{time}^{-1} \cdot \text{molecules}^{-1}$ | 0.1           | Formation of complex with lattice bound, adjacent agents |
| $k_{\text{decay}}$   | $\text{time}^{-1}$                             | 0.001         | Dissociation of agent complexes                          |
| $L_x L_y$            | $\text{length} \cdot \text{length}$            | $10^4$        | Area of lattice surface                                  |

Table S1. Parameters of the lattice model. The units for each parameter, the standard value used in simulations, and the role of the parameter. Molecules are a count of agents or resources. Time is in arbitrary simulation units. Length is in units of a lattice site.
