# Supplementary material
Source: PubMed Central journal article supplement (PMC1891208)

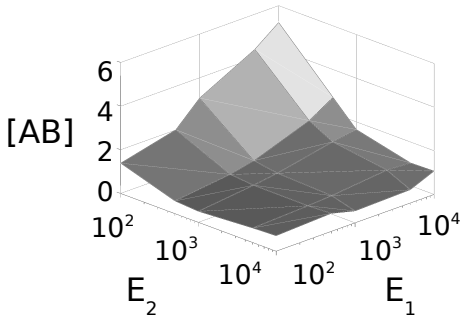

Supplement: pnas_0703522104_1.pdf [file pnas_0703522104_1.pdf]

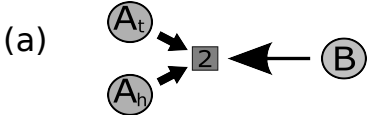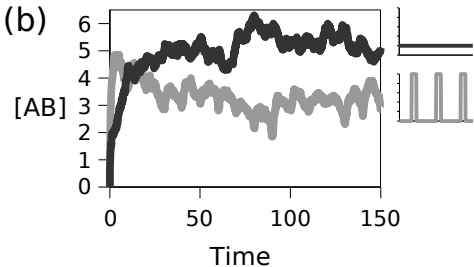

Supplement: pnas_0703522104_2.pdf [file pnas_0703522104_2.pdf]
